# Supplementary material for: Clinical Study of Aspirin and Zileuton on Biomarkers of Tobacco-Related Carcinogenesis in Current Smokers
Source: Cancers (Basel). 2022 Jun 11;14(12):2893. doi: 10.3390/cancers14122893 (PMC9221101; doi:10.3390/cancers14122893)
Supplement: Supplementary file 1 [file cancers-14-02893-s001.zip › Copy of JCI Insight Garland 11-17-21 Excel Tables S3-9.xlsx]

## Sheet: STable 3Gene signature scores f
CELFileName	Bronchial Dysplasia, Beane et al.	Endobronchial biopsy high-grade lesion, Beane et al	Nasal smoking, Zhang et al	Bronchial COPD, Steiling et al	Bronchial smoking, Beane et al.	Nasal lung cancer (n=535 genes), Perez-Rodgers et al.	Nasal lung cancer (n=35 genes), Perez-Rodgers et al.	Bronchial PI3K, Gustafson et al.	Bronchial lung cancer (Percepta), Whitney et al.	PTID	visitID	treatment	Timepoint
JB_A1_Z1.CEL	6.83115	-4.52508	6.97621	-2.04758	-2.61942	11.0016	-0.403089	0.698981	0.365709	ZIL01001	Visit 2	Placebo	Baseline
JB_A1_Z4.CEL	0.784936	6.33867	0.071095	1.17552	2.05185	2.24535	1.06159	-2.86687	0.888636	ZIL01005	Visit 2	Placebo	Baseline
JB_A1_Z7.CEL	9.53464	0.600169	-0.405664	0.763865	0.83945	11.8355	3.30214	-2.65219	0.663239	ZIL01008	Visit 2	Aspirin+Zileuton	Baseline
JB_A4_Z10.CEL	2.82177	-3.21942	4.04928	-2.22709	-5.43717	7.06507	0.716432	-0.524372	0.759289	ZIL01009	Visit 2	Placebo	Baseline
JB_A4_Z13.CEL	4.91986	-14.8778	9.5357	-5.83558	-3.59447	17.4067	4.04629	-3.46264	0.886053	ZIL01011	Visit 2	Aspirin+Zileuton	Baseline
JB_A4_Z16.CEL	10.9348	-6.44586	6.20174	2.106	-1.2503	7.69457	0.122695	0.0476276	0.566804	ZIL01013	Visit 2	Placebo	Baseline
JB_A7_Z19.CEL	0.389788	-6.23947	-1.19584	-1.05129	3.39845	-3.96217	-3.04986	-1.94966	0.858516	ZIL01014	Visit 2	Placebo	Baseline
JB_A7_Z22.CEL	-7.66721	0.527506	-0.226531	-2.32311	-5.77625	22.8132	5.0753	-0.852247	0.207255	ZIL01017	Visit 2	Placebo	Baseline
JB_B2_Z28.CEL	-5.42057	10.8797	-2.38131	1.93331	1.66057	-20.0523	-7.0251	2.58347	0.459912	ZIL01022	Visit 2	Placebo	Baseline
JB_B2_Z31.CEL	10.0515	3.85565	-0.457576	0.855131	2.03522	7.50057	4.08442	0.782445	0.784443	ZIL01028	Visit 2	Aspirin+Zileuton	Baseline
JB_B2_Z34.CEL	-5.71871	3.80938	-1.87235	2.90401	-1.48577	-11.4487	-4.7547	-0.259258	0.32538	ZIL01029	Visit 2	Aspirin+Zileuton	Baseline
JB_B5_Z37.CEL	0.595024	-7.60482	3.51157	-4.75153	-1.41212	9.50033	3.27068	-0.363051	0.760687	ZIL01035	Visit 2	Aspirin+Zileuton	Baseline
JB_B5_Z40.CEL	-3.23833	0.768821	-0.719238	-0.391245	2.71773	0.302823	-1.91882	0.552451	0.688961	ZIL01038	Visit 2	Aspirin+Zileuton	Baseline
JB_B5_Z43.CEL	-0.781867	-7.27985	-2.87885	-0.852123	3.48511	3.70458	1.63375	-1.05082	0.73672	ZIL01042	Visit 2	Placebo	Baseline
JB_B8_Z49.CEL	1.81409	-9.91874	6.27141	-5.66873	-5.67552	9.52601	2.00522	0.95525	0.77663	ZIL01045	Visit 2	Placebo	Baseline
JB_B8_Z52.CEL	3.16535	-9.7868	4.30805	-4.07014	-2.6281	11.5016	3.54425	1.57719	0.821362	ZIL01055	Visit 2	Aspirin+Zileuton	Baseline
JB_C3_Z55.CEL	0.190786	-3.82806	-0.0270773	-0.369096	0.858584	3.26663	0.187028	-1.97604	0.766459	ZIL01058	Visit 2	Placebo	Baseline
JB_C3_Z58.CEL	1.23957	-11.6326	3.4341	-4.03527	0.810208	9.75391	5.13083	1.27975	0.90412	ZIL01061	Visit 2	Placebo	Baseline
JB_C3_Z61.CEL	-5.6589	-10.9911	-0.736679	-0.598146	1.42136	-7.05443	-0.963371	-0.873686	0.819053	ZIL01063	Visit 2	Aspirin+Zileuton	Baseline
JB_C6_Z64.CEL	0.176047	-11.7564	11.7185	-3.58734	-9.6374	13.9432	1.98903	-1.39868	0.383473	ZIL01068	Visit 2	Aspirin+Zileuton	Baseline
JB_C6_Z67.CEL	0.330613	-2.09877	-5.63762	2.39347	4.8421	1.0817	0.988637	-2.21592	0.504986	ZIL01070	Visit 2	Placebo	Baseline
JB_C6_Z70.CEL	3.06552	0.350404	1.05203	1.48123	2.64887	-4.60003	-0.166978	2.00012	0.772468	ZIL01071	Visit 2	Aspirin+Zileuton	Baseline
JB_D1_Z73.CEL	7.41784	-8.83912	0.530842	1.78965	5.18274	-14.6576	-4.08454	2.00941	0.805443	ZIL01074	Visit 2	Aspirin+Zileuton	Baseline
JB_D1_Z76.CEL	-2.79026	-0.886177	-2.77311	0.0776895	4.40962	-6.70262	-0.870678	-0.807636	0.77249	ZIL01077	Visit 2	Aspirin+Zileuton	Baseline
JB_D2_Z85.CEL	-0.733013	9.07912	-1.27709	3.07076	0.511242	-11.7886	-1.45194	2.43337	0.560202	ZIL01103	Visit 2	Aspirin+Zileuton	Baseline
JB_D3_Z82.CEL	-6.49167	-1.00131	-1.62623	-0.679547	2.8946	-15.9369	-4.40602	-0.707902	0.776189	ZIL01102	Visit 2	Placebo	Baseline
JB_D4_Z79.CEL	1.90959	-2.62972	3.58096	-3.65349	-2.84826	14.5434	4.42109	-1.33256	0.91451	ZIL01092	Visit 2	Placebo	Baseline
JB_D5_Z94.CEL	-1.90318	7.48443	-2.60078	-1.74315	2.20223	2.58838	1.80756	0.778117	0.807906	ZIL01109	Visit 2	Placebo	Baseline
JB_D6_Z91.CEL	-1.29943	-7.06035	-0.218507	-1.16498	2.24452	3.49489	0.390861	-0.138762	0.752984	ZIL01107	Visit 2	Aspirin+Zileuton	Baseline
JB_D7_Z102.CEL	0.500558	5.76643	-3.99851	1.52359	-0.541665	-5.52623	-0.505164	4.42204	0.746869	ZIL01117	Visit 2	Placebo	Baseline
JB_D7_Z88.CEL	0.0052734	10.7817	-1.77725	3.04801	4.05113	-17.1294	-3.59942	2.84956	0.700174	ZIL01104	Visit 2	Placebo	Baseline
JB_E1_Z99.CEL	-3.35768	-3.37402	0.676268	2.71654	-0.564945	-6.72483	-1.76179	-0.818723	0.361194	ZIL01116	Visit 2	Aspirin+Zileuton	Baseline
JB_E2_Z111.CEL	-7.59978	7.16929	-3.47617	2.49524	2.18672	-25.3958	-7.19071	0.367327	0.902749	ZIL01124	Visit 2	Placebo	Baseline
JB_E2_Z96.CEL	1.91677	-0.296378	-1.32188	5.23354	2.68875	-17.2708	-5.49039	0.172625	0.826023	ZIL01112	Visit 2	Placebo	Baseline
JB_E4_Z108.CEL	-0.26623	5.11907	0.731217	0.840133	-1.29181	2.31533	0.85151	0.46908	0.714667	ZIL01123	Visit 2	Aspirin+Zileuton	Baseline
JB_E5_Z105.CEL	-12.3858	4.34785	-4.45689	1.11079	-3.29338	-6.2583	-0.118022	-2.10135	0.852853	ZIL01118	Visit 2	Placebo	Baseline
JB_E5_Z120.CEL	-5.00391	7.74366	-2.87263	2.30746	0.157294	-6.93293	0.677521	-0.924163	0.726399	ZIL01127	Visit 2	Aspirin+Zileuton	Baseline
JB_E8_Z114.CEL	-6.40812	-0.735483	-3.76321	1.31041	2.23954	-7.0918	-1.23778	-1.32859	0.704176	ZIL01125	Visit 2	Aspirin+Zileuton	Baseline
JB_F1_Z126.CEL	0.618529	4.37091	-1.41136	1.85566	2.20065	-12.9179	-4.59053	0.245914	0.717438	ZIL01132	Visit 2	Aspirin+Zileuton	Baseline
JB_F3_Z123.CEL	1.90547	5.50194	-2.12895	0.816962	-2.86501	-3.5141	-1.13685	0.547311	0.513418	ZIL01129	Visit 2	Placebo	Baseline
JB_A2_Z2.CEL	13.2689	-8.8602	4.81919	-1.34204	-1.71532	18.8794	2.80026	0.0538197	0.355263	ZIL01001	Visit 5	Placebo	End-of-treatment
JB_A2_Z5.CEL	1.42201	4.45607	-0.129718	1.45878	0.717368	6.88495	-0.919803	-1.91257	0.776836	ZIL01005	Visit 5	Placebo	End-of-treatment
JB_A2_Z8.CEL	0.471041	0.0413355	-0.821714	1.7555	1.16401	4.0105	-0.482166	-1.40584	0.468347	ZIL01008	Visit 5	Aspirin+Zileuton	End-of-treatment
JB_A5_Z11.CEL	7.37931	-4.10348	5.5546	-1.99806	-3.54394	4.34274	-1.27912	0.210636	0.647045	ZIL01009	Visit 5	Placebo	End-of-treatment
JB_A5_Z14.CEL	1.21278	-15.7664	11.5068	-4.50879	-4.41495	9.15375	2.69729	-1.80953	0.785047	ZIL01011	Visit 5	Aspirin+Zileuton	End-of-treatment
JB_A5_Z17.CEL	10.8329	11.9696	2.98001	1.64096	-2.21689	10.8428	2.23238	1.30177	0.541493	ZIL01013	Visit 5	Placebo	End-of-treatment
JB_A8_Z20.CEL	0.258585	-3.48304	-5.66667	-0.662751	6.23501	-8.83756	-2.44491	1.51758	0.849311	ZIL01014	Visit 5	Placebo	End-of-treatment
JB_A8_Z23.CEL	4.88274	8.64814	3.27323	-4.60208	-6.60202	26.5352	6.52677	-0.487246	0.298787	ZIL01017	Visit 5	Placebo	End-of-treatment
JB_A8_Z26.CEL	3.19677	0.823073	-2.54566	-1.14912	-2.29557	16.572	6.80534	-1.12058	0.755908	ZIL01020	Visit 5	Aspirin+Zileuton	End-of-treatment
JB_B3_Z29.CEL	2.54677	1.8251	-0.604556	1.43286	-0.246531	-11.2287	-6.13527	2.08724	0.411182	ZIL01022	Visit 5	Placebo	End-of-treatment
JB_B3_Z32.CEL	2.07003	0.41761	-1.54158	-0.240439	0.986222	-0.874166	-0.00995481	1.14984	0.766942	ZIL01028	Visit 5	Aspirin+Zileuton	End-of-treatment
JB_B3_Z35.CEL	-6.90491	1.62215	-0.649426	1.14261	-2.07363	-1.67082	-0.244668	-2.77211	0.495158	ZIL01029	Visit 5	Aspirin+Zileuton	End-of-treatment
JB_B6_Z38.CEL	-4.39611	-18.7023	5.17153	-7.20044	-4.7994	19.1118	5.58166	-2.42748	0.808226	ZIL01035	Visit 5	Aspirin+Zileuton	End-of-treatment
JB_B6_Z41.CEL	0.0339755	1.82005	-0.739172	-1.48351	1.13306	6.9798	2.64816	0.992668	0.740958	ZIL01038	Visit 5	Aspirin+Zileuton	End-of-treatment
JB_B6_Z44.CEL	1.56532	-9.73401	-2.41047	1.29923	4.13973	6.83595	3.55265	-0.606816	0.759413	ZIL01042	Visit 5	Placebo	End-of-treatment
JB_C1_Z47.CEL	2.50954	-1.94711	-2.18532	-0.210033	4.03768	1.27946	1.33571	0.638067	0.76188	ZIL01043	Visit 5	Aspirin+Zileuton	End-of-treatment
JB_C1_Z50.CEL	3.23734	-10.709	4.25718	-3.95653	-2.07452	0.216893	-0.812217	2.5638	0.721959	ZIL01045	Visit 5	Placebo	End-of-treatment
JB_C1_Z53.CEL	-3.98616	-10.1152	3.13301	-4.76767	-2.74153	14.4184	5.02184	-0.285928	0.852343	ZIL01055	Visit 5	Aspirin+Zileuton	End-of-treatment
JB_C4_Z56.CEL	0.610692	-4.08424	-1.41843	2.09255	1.90806	-5.38317	-2.55433	-0.794738	0.603565	ZIL01058	Visit 5	Placebo	End-of-treatment
JB_C4_Z59.CEL	-1.37275	-7.17411	4.76518	-3.45611	-2.22528	-0.392672	1.24541	1.57907	0.856041	ZIL01061	Visit 5	Placebo	End-of-treatment
JB_C4_Z62.CEL	1.03092	-3.14744	-3.32615	-1.84004	2.9449	0.970482	0.77256	0.11821	0.825203	ZIL01063	Visit 5	Aspirin+Zileuton	End-of-treatment
JB_C7_Z65.CEL	-3.83415	-4.98128	6.08535	1.00108	-7.54268	0.198909	-2.65527	-2.24478	0.179882	ZIL01068	Visit 5	Aspirin+Zileuton	End-of-treatment
JB_C7_Z68.CEL	0.586306	-8.48492	-2.58969	-0.768543	4.14476	7.20145	4.42114	-0.89052	0.858478	ZIL01070	Visit 5	Placebo	End-of-treatment
JB_C7_Z71.CEL	1.78179	5.93603	-3.91404	3.80713	4.00399	-9.41202	-3.0182	0.991333	0.594126	ZIL01071	Visit 5	Aspirin+Zileuton	End-of-treatment
JB_D2_Z74.CEL	4.33261	-6.48592	4.49535	-0.0374333	2.12803	0.717355	1.43307	1.15738	0.91622	ZIL01074	Visit 5	Aspirin+Zileuton	End-of-treatment
JB_D2_Z77.CEL	-8.15656	1.52192	1.30197	-4.8832	-5.5244	10.6544	2.04848	-3.76346	0.772783	ZIL01077	Visit 5	Aspirin+Zileuton	End-of-treatment
JB_D3_Z86.CEL	-1.68261	13.9111	-2.22835	2.98102	0.0492418	-8.68562	-1.78512	2.93514	0.544405	ZIL01103	Visit 5	Aspirin+Zileuton	End-of-treatment
JB_D4_Z83.CEL	-1.28668	1.41993	0.0600576	-2.28439	-0.276445	-6.55954	-3.31034	2.7344	0.801002	ZIL01102	Visit 5	Placebo	End-of-treatment
JB_D5_Z80.CEL	0.470492	-3.07629	2.17359	-1.63072	-1.16496	10.1148	4.80924	-1.0684	0.88609	ZIL01092	Visit 5	Placebo	End-of-treatment
JB_D6_Z95.CEL	3.12115	4.08283	0.494661	-0.606694	-0.654656	8.94948	2.14904	-0.965466	0.780246	ZIL01109	Visit 5	Placebo	End-of-treatment
JB_D7_Z92.CEL	0.974477	5.92802	-4.26227	1.67094	5.10822	-1.82595	-0.517792	0.355241	0.698931	ZIL01107	Visit 5	Aspirin+Zileuton	End-of-treatment
JB_D8_Z103.CEL	-1.92976	5.48059	-1.50125	1.95607	-1.07587	-6.57124	-1.25443	0.858514	0.794188	ZIL01117	Visit 5	Placebo	End-of-treatment
JB_D8_Z89.CEL	-2.27477	6.51159	-2.49915	1.54592	0.937225	-12.4456	-3.07538	1.26863	0.626414	ZIL01104	Visit 5	Placebo	End-of-treatment
JB_E2_Z100.CEL	-6.35545	-0.933879	-1.14426	3.0519	0.528186	-3.90151	-0.540543	-1.37988	0.307149	ZIL01116	Visit 5	Aspirin+Zileuton	End-of-treatment
JB_E3_Z112.CEL	-6.62804	10.3919	-4.17862	1.82343	0.81829	-8.15903	-1.19796	-0.251598	0.933744	ZIL01124	Visit 5	Placebo	End-of-treatment
JB_E3_Z97.CEL	-2.0166	1.03333	1.68021	-2.83709	-7.58378	18.786	2.56936	-1.11591	0.870933	ZIL01112	Visit 5	Placebo	End-of-treatment
JB_E5_Z109.CEL	-3.04346	1.1404	4.75712	-2.37449	-4.72721	10.3119	1.07252	-2.39795	0.722233	ZIL01123	Visit 5	Aspirin+Zileuton	End-of-treatment
JB_E6_Z106.CEL	-4.55082	2.29834	-3.40087	3.68489	3.49892	-21.0317	-5.75677	-0.234351	0.770654	ZIL01118	Visit 5	Placebo	End-of-treatment
JB_E6_Z121.CEL	-3.29529	2.36895	-0.669019	0.962919	0.353044	-3.3705	0.95561	0.682025	0.745598	ZIL01127	Visit 5	Aspirin+Zileuton	End-of-treatment
JB_E7_Z118.CEL	-5.57097	3.08982	-1.41668	2.36112	3.51928	-6.85708	-4.22215	-1.63657	0.572285	ZIL01126	Visit 5	Placebo	End-of-treatment
JB_F1_Z115.CEL	-4.84466	-1.20407	-4.54442	0.369773	1.92663	-12.0946	-3.53321	0.603821	0.778613	ZIL01125	Visit 5	Aspirin+Zileuton	End-of-treatment
JB_F2_Z127.CEL	-4.32945	0.490837	0.0787298	0.795605	-1.42244	-12.2541	-3.85747	0.512268	0.755542	ZIL01132	Visit 5	Aspirin+Zileuton	End-of-treatment
JB_F4_Z124.CEL	-0.0791464	5.50052	-3.34845	-0.353159	-1.16343	-13.2649	-5.1299	2.05346	0.524296	ZIL01129	Visit 5	Placebo	End-of-treatment
JB_A3_Z3.CEL	14.2004	5.72355	-1.47549	0.825883	-0.888758	18.4275	3.06028	-0.742879	0.222627	ZIL01001	Visit 6	Placebo	One-week post-treatment
JB_A3_Z6.CEL	8.54538	6.81782	-2.39804	4.43182	6.00063	-11.9374	-3.91539	0.773626	0.792194	ZIL01005	Visit 6	Placebo	One-week post-treatment
JB_A3_Z9.CEL	1.18994	-0.784937	3.00103	0.508303	-1.10281	6.81928	1.11472	-0.225724	0.698118	ZIL01008	Visit 6	Aspirin+Zileuton	One-week post-treatment
JB_A6_Z12.CEL	-3.64772	-1.54781	3.81996	-0.545689	-5.61446	-3.40585	-2.59814	-2.09138	0.661471	ZIL01009	Visit 6	Placebo	One-week post-treatment
JB_A6_Z15.CEL	1.4385	-15.7148	10.8668	-5.56371	-5.85581	20.4074	6.00654	-3.62233	0.893949	ZIL01011	Visit 6	Aspirin+Zileuton	One-week post-treatment
JB_A6_Z18.CEL	23.7282	2.72911	4.59462	1.17847	0.143885	7.84098	-0.0654177	3.70392	0.582878	ZIL01013	Visit 6	Placebo	One-week post-treatment
JB_B1_Z21.CEL	3.97445	11.5343	-3.41599	1.47172	4.26772	-3.54669	0.90307	1.26225	0.83431	ZIL01014	Visit 6	Placebo	One-week post-treatment
JB_B1_Z24.CEL	6.98716	8.94123	2.65195	1.61525	-1.04041	7.9749	3.35107	0.633769	0.535557	ZIL01017	Visit 6	Placebo	One-week post-treatment
JB_B4_Z30.CEL	0.991728	9.56899	-8.13809	4.01151	5.73365	-7.74364	-1.39302	-1.39511	0.511543	ZIL01022	Visit 6	Placebo	One-week post-treatment
JB_B4_Z33.CEL	-5.71111	9.97703	-3.30485	-0.0898317	-0.0478598	-2.33383	1.70417	-0.764986	0.804187	ZIL01028	Visit 6	Aspirin+Zileuton	One-week post-treatment
JB_B4_Z36.CEL	-2.70164	-4.27597	2.29812	-0.532303	-2.07701	0.670451	1.02213	-0.230496	0.470335	ZIL01029	Visit 6	Aspirin+Zileuton	One-week post-treatment
JB_B7_Z39.CEL	-2.58907	-9.86837	3.47243	-2.9234	-2.87904	10.0304	4.44991	-1.52397	0.735455	ZIL01035	Visit 6	Aspirin+Zileuton	One-week post-treatment
JB_B7_Z42.CEL	-2.34547	0.124806	-1.85819	-0.942687	0.938592	-0.127396	0.918573	1.6185	0.656512	ZIL01038	Visit 6	Aspirin+Zileuton	One-week post-treatment
JB_B7_Z45.CEL	-7.36317	7.63275	-7.11423	4.96858	4.8522	-6.19215	0.100428	-0.643156	0.599899	ZIL01042	Visit 6	Placebo	One-week post-treatment
JB_C2_Z48.CEL	6.69948	-0.722553	3.06035	-4.96144	-0.756923	15.7145	3.63818	0.378728	0.825476	ZIL01043	Visit 6	Aspirin+Zileuton	One-week post-treatment
JB_C2_Z51.CEL	4.51645	-9.14288	1.87105	-1.20428	-0.216182	-2.06827	0.280331	2.05455	0.684344	ZIL01045	Visit 6	Placebo	One-week post-treatment
JB_C2_Z54.CEL	7.773	-0.88793	4.18342	-3.49256	-0.0372862	16.4955	5.75381	0.811479	0.842235	ZIL01055	Visit 6	Aspirin+Zileuton	One-week post-treatment
JB_C5_Z57.CEL	-0.197905	2.15079	0.612031	1.86055	0.169255	-6.14307	-2.79063	-1.04921	0.65743	ZIL01058	Visit 6	Placebo	One-week post-treatment
JB_C5_Z60.CEL	-3.59841	-9.31882	4.31195	-6.08277	-2.20799	5.61068	0.590195	0.23992	0.840534	ZIL01061	Visit 6	Placebo	One-week post-treatment
JB_C5_Z63.CEL	0.985496	-9.87024	4.08023	-0.918298	0.286415	5.01167	2.10257	1.02523	0.871491	ZIL01063	Visit 6	Aspirin+Zileuton	One-week post-treatment
JB_C8_Z69.CEL	1.27637	-9.41627	1.06487	0.650478	-0.730031	9.23113	1.9026	-2.08591	0.722456	ZIL01070	Visit 6	Placebo	One-week post-treatment
JB_C8_Z72.CEL	-0.370478	3.85185	-3.0734	2.42021	0.962131	-0.805114	-1.66331	-1.97755	0.599662	ZIL01071	Visit 6	Aspirin+Zileuton	One-week post-treatment
JB_D1_Z78.CEL	-6.46188	20.2902	-1.16782	-3.03957	-4.31884	1.84733	2.04287	-0.557795	0.792734	ZIL01077	Visit 6	Aspirin+Zileuton	One-week post-treatment
JB_D3_Z75.CEL	0.294307	-2.65141	-2.70396	3.32335	3.89032	-4.70244	-1.00479	-0.728738	0.731721	ZIL01074	Visit 6	Aspirin+Zileuton	One-week post-treatment
JB_D4_Z87.CEL	-1.54023	6.84524	-2.62541	1.97458	0.650997	-11.0685	-1.56021	1.04882	0.49048	ZIL01103	Visit 6	Aspirin+Zileuton	One-week post-treatment
JB_D5_Z84.CEL	0.865748	5.53086	-2.63561	0.759279	4.25796	-18.4734	-3.65888	4.56013	0.786957	ZIL01102	Visit 6	Placebo	One-week post-treatment
JB_D6_Z81.CEL	2.86313	0.907918	0.113031	0.159589	1.37923	3.94708	2.39092	1.20546	0.836908	ZIL01092	Visit 6	Placebo	One-week post-treatment
JB_D8_Z93.CEL	0.935958	6.08952	-6.16665	2.82844	6.4093	-4.66372	-1.4772	0.275452	0.651408	ZIL01107	Visit 6	Aspirin+Zileuton	One-week post-treatment
JB_E1_Z104.CEL	-1.1299	7.65365	0.352268	3.99157	-0.0387067	-11.2145	-2.28453	3.41621	0.732844	ZIL01117	Visit 6	Placebo	One-week post-treatment
JB_E1_Z90.CEL	1.81046	5.39281	-2.52228	-0.269273	-0.958913	-0.0454514	-0.478636	1.15085	0.714176	ZIL01104	Visit 6	Placebo	One-week post-treatment
JB_E3_Z101.CEL	-0.782726	-7.58196	3.21543	0.255447	-1.63421	3.18472	0.85442	-1.89199	0.405726	ZIL01116	Visit 6	Aspirin+Zileuton	One-week post-treatment
JB_E4_Z113.CEL	-9.11619	5.70063	-5.46848	2.08482	-1.44959	-5.11201	-0.232898	-1.44529	0.812529	ZIL01124	Visit 6	Placebo	One-week post-treatment
JB_E4_Z98.CEL	-0.383311	-0.682693	0.215899	0.203015	-2.27442	-2.93037	-3.06108	1.33415	0.817423	ZIL01112	Visit 6	Placebo	One-week post-treatment
JB_E6_Z110.CEL	-5.54696	10.5232	-0.376124	1.57331	-4.34869	4.59432	1.76382	1.02442	0.48999	ZIL01123	Visit 6	Aspirin+Zileuton	One-week post-treatment
JB_E7_Z107.CEL	-9.59189	-0.531673	-3.89024	1.61288	1.76398	-13.2524	-3.78481	-1.88637	0.81909	ZIL01118	Visit 6	Placebo	One-week post-treatment
JB_E7_Z122.CEL	-2.65262	8.17603	-5.58579	3.67125	1.65944	-3.35347	0.540553	0.115114	0.631607	ZIL01127	Visit 6	Aspirin+Zileuton	One-week post-treatment
JB_E8_Z119.CEL	-0.327482	1.4168	-2.70081	2.96494	3.687	-3.12755	-1.52232	-1.22688	0.598294	ZIL01126	Visit 6	Placebo	One-week post-treatment
JB_F2_Z116.CEL	-7.07549	-0.534674	-6.10559	-0.850783	-0.0102165	-4.80638	-1.49724	0.125221	0.748175	ZIL01125	Visit 6	Aspirin+Zileuton	One-week post-treatment
JB_F3_Z128.CEL	-2.89134	4.62434	1.3283	1.18244	-1.56233	-13.1591	-2.86769	0.970906	0.722372	ZIL01132	Visit 6	Aspirin+Zileuton	One-week post-treatment
JB_F5_Z125.CEL	3.40197	5.68781	-6.3763	3.03338	3.09565	-22.8406	-5.89332	3.59916	0.551768	ZIL01129	Visit 6	Placebo	One-week post-treatment

## Sheet: STable4 Intervention sig
Gene symbol	Entrez Gene Probe ID	T statistic	P value	Direction of change with ASA+Z intervention
ZDBF2	57683_at	-4.14805	6.35696e-05	down
ZKSCAN2	342357_at	-3.69682	0.000332794	down
RTL8A	26071_at	-3.41743	0.000868452	down
PCDHA13	56136_at	-3.35476	0.00106917	down
PBX3	5090_at	-3.14566	0.00209815	down
C1orf54	79630_at	-3.10569	0.00237836	down
HMGN1P30	100132992_at	-3.06644	0.00268699	down
PELO	53918_at	-3.05321	0.00279916	down
POU2F3	25833_at	-2.99839	0.00331132	down
SGF29	112869_at	-2.99721	0.00332327	down
C1QTNF3	114899_at	-2.99331	0.00336299	down
NA	112268233_at	-2.99012	0.00339579	down
GGTA1P	2681_at	-2.9523	0.00380755	down
SDHC	6391_at	-2.86985	0.00486908	down
MAGOH	4116_at	-2.86857	0.00488743	down
LOC440311	440311_at	-2.86241	0.00497713	down
HSPE1P7	100132346_at	-2.81583	0.00570481	down
RPL22L1	200916_at	-2.81149	0.00577746	down
VN1R1	57191_at	-2.80071	0.00596132	down
C2orf76	130355_at	-2.76871	0.00653891	down
SF3B4	10262_at	-2.74955	0.00690877	down
ZNF285	26974_at	-2.70499	0.00784331	down
LY6G5C	80741_at	-2.70043	0.00794523	down
CCDC59	29080_at	-2.69398	0.00809123	down
EGLN1P1	106660614_at	-2.68477	0.00830419	down
SRP72P2	153932_at	-2.67773	0.00847023	down
SPR	6697_at	-2.66189	0.00885521	down
LOC646813	646813_at	-2.65547	0.00901543	down
NA	105373132_at	-2.65228	0.00909632	down
UBE2MP1	606551_at	-2.64505	0.00928152	down
ZNF441	126068_at	-2.63897	0.00943999	down
HPF1	54969_at	-2.63116	0.0096471	down
ZNF263	10127_at	3.97872	0.00012009	up
XAGE5	170627_at	3.61123	0.000448936	up
SIGLEC16	400709_at	3.34242	0.0011135	up
HPR	3250_at	3.34084	0.00111932	up
MCHR2	84539_at	3.32906	0.00116346	up
FAM30A	9834_at	3.25559	0.00147762	up
INSL3	3640_at	3.24109	0.00154828	up
SRRM4	84530_at	3.22954	0.00160685	up
INKA1	389119_at	3.14734	0.00208704	up
RNU4-44P	106479578_at	3.11835	0.00228606	up
PEX5L	51555_at	3.11796	0.00228886	up
SSX5	6758_at	3.1104	0.00234361	up
USP26	83844_at	3.0762	0.002607	up
PARP10	84875_at	3.07154	0.00264491	up
COQ8A	56997_at	3.01605	0.0031376	up
IGLON5	402665_at	2.99388	0.00335713	up
HSD3B7	80270_at	2.97312	0.00357545	up
LRSAM1	90678_at	2.96263	0.00369065	up
MIR200A	406983_at	2.89994	0.00445359	up
TRBV21OR9-2	6959_at	2.88572	0.00464564	up
TRIM11	81559_at	2.87317	0.00482148	up
NPEPL1	79716_at	2.85663	0.00506251	up
IQCN	80726_at	2.84276	0.00527308	up
CNMD	11061_at	2.83188	0.00544373	up
MIR200B	406984_at	2.82889	0.00549163	up
ARHGEF40	55701_at	2.80672	0.00585807	up
DDIT4	54541_at	2.80606	0.00586944	up
NCKIPSD	51517_at	2.79401	0.00607815	up
CPB2	1361_at	2.78546	0.00623054	up
LOC100128988	100128988_at	2.76236	0.00665944	up
KLHL33	123103_at	2.75684	0.00676577	up
SLC1A2	6506_at	2.74236	0.00705238	up
OLIG1	116448_at	2.74162	0.00706719	up
GC	2638_at	2.73851	0.00713039	up
IKBKB	3551_at	2.73167	0.00727082	up
PTH	5741_at	2.72962	0.00731344	up
CYP1A2	1544_at	2.72509	0.00740839	up
GLYCTK	132158_at	2.71435	0.00763793	up
HAUS8	93323_at	2.714	0.00764561	up
MTMR4	9110_at	2.71189	0.00769145	up
LOC155060	155060_at	2.68795	0.00823003	up
ARID1B	57492_at	2.67574	0.00851779	up
LZTR1	8216_at	2.66322	0.00882233	up
ZFYVE19	84936_at	2.6511	0.00912632	up
TLX1	3195_at	2.64588	0.00926019	up
AOC3	8639_at	2.64112	0.00938374	up
SMS	6611_at	2.63561	0.00952868	up
LOC401875	401875_at	2.63149	0.00963821	up
LOC112267894	112267894_at	2.63051	0.00966447	up
GPR45	11250_at	2.62787	0.00973563	up
APOC3	345_at	2.62257	0.00987958	up

## Sheet: STable5 Post_intervention sig
Gene symbol	Entrez Gene Probe ID	T statistic	P value	Direction of change with ASA+Z intervention
ZDBF2	57683_at	-4.003	0.000109741	down
PCDHGA8	9708_at	-3.6827	0.000349752	down
SDR16C5	195814_at	-3.45779	0.000758512	down
DEPDC1	55635_at	-3.32767	0.00116875	down
UBE2E2	7325_at	-3.29013	0.00132114	down
UBE2Q2P1	388165_at	-3.24616	0.00152321	down
HMGN1P30	100132992_at	-3.21831	0.00166577	down
GRPEL1	80273_at	-3.12809	0.00221728	down
RTCB	51493_at	-3.11112	0.00233838	down
FAM92A	137392_at	-3.08839	0.00251008	down
ATP6V1G1	9550_at	-2.88033	0.00472054	down
ARG2	384_at	-2.84522	0.00523511	down
FAM207A	85395_at	-2.84325	0.00526555	down
MPLKIP	136647_at	-2.83439	0.00540396	down
UQCRB	7381_at	-2.8001	0.00597189	down
SLC39A2	29986_at	-2.77988	0.00633176	down
PCDHB15	56121_at	-2.75157	0.00686884	down
NDUFB4	4710_at	-2.71091	0.00771281	down
TMSB4XP4	7118_at	-2.70697	0.00779947	down
EGLN1P1	106660614_at	-2.69116	0.00815593	down
HIGD1AP1	100129086_at	-2.69041	0.00817319	down
CENPW	387103_at	-2.68888	0.00820856	down
MAD2L1BP	9587_at	-2.6786	0.00844959	down
CCPG1	9236_at	-2.66951	0.008668	down
BRD7P2	647076_at	-2.6464	0.00924671	down
MRPS18C	51023_at	-2.63957	0.00942413	down
SNORD20	6082_at	-2.62485	0.00981747	down
LOC100289060	100289060_at	4.4044	2.34903e-05	up
SHISA6	388336_at	3.88326	0.000170553	up
RNA5SP50	106478992_at	3.8759	0.000175187	up
IQCN	80726_at	3.8487	0.000193379	up
CATSPER4	378807_at	3.80635	0.00022532	up
GNRH1	2796_at	3.72625	0.000299914	up
CPNE7	27132_at	3.52395	0.00060617	up
AFG3L1P	172_at	3.47017	0.000727511	up
PSMB11	122706_at	3.41672	0.000870517	up
TCF19	6941_at	3.41548	0.000874112	up
DNAJC22	79962_at	3.39909	0.000923194	up
STUM	375057_at	3.38696	0.000961162	up
ARSI	340075_at	3.36952	0.00101832	up
C22orf39	128977_at	3.29718	0.00129118	up
LTB4R2	56413_at	3.2858	0.00133987	up
CHAT	1103_at	3.27202	0.00140114	up
MT3	4504_at	3.21198	0.00169981	up
TUBA3E	112714_at	3.13524	0.00216807	up
CYP1A2	1544_at	3.13233	0.00218797	up
KLK2	3817_at	3.11301	0.00232455	up
GPC6	10082_at	3.10936	0.00235127	up
DUXA	503835_at	3.09652	0.00244736	up
PTPN7	5778_at	3.05265	0.00280399	up
MBL2	4153_at	3.0382	0.00293157	up
ALPG	251_at	3.02825	0.00302253	up
RN7SL665P	106481104_at	3.00928	0.00320314	up
MS4A10	341116_at	2.99282	0.00336797	up
TCF7	6932_at	2.9927	0.00336916	up
RNU6-890P	106480618_at	2.98804	0.00341724	up
DEFB133	403339_at	2.97366	0.00356967	up
MIR330	442902_at	2.97279	0.00357903	up
GPR31	2853_at	2.96291	0.00368758	up
OR5M1	390168_at	2.9625	0.00369214	up
VN1R3	317702_at	2.96024	0.00371739	up
CSPG4	1464_at	2.95683	0.00375591	up
OR3A1	4994_at	2.95117	0.0038205	up
LINC01869	284365_at	2.94404	0.00390337	up
GJA4	2701_at	2.93771	0.00397829	up
SLC6A13	6540_at	2.93605	0.0039981	up
ADH1B	125_at	2.931	0.00405917	up
CROCCP3	114819_at	2.92212	0.00416858	up
OPTC	26254_at	2.90943	0.00432957	up
FAM27E5	284123_at	2.90325	0.00441002	up
LCA10	100996465_at	2.8876	0.00461991	up
SNN	8303_at	2.88582	0.00464427	up
CEACAM16	388551_at	2.88248	0.00469053	up
PEX5L	51555_at	2.86528	0.00493507	up
TRIM67	440730_at	2.85493	0.00508786	up
C16orf95	100506581_at	2.84596	0.00522372	up
SLC26A8	116369_at	2.83647	0.00537109	up
OR2J1	442185_at	2.81629	0.00569725	up
CRTC1	23373_at	2.81408	0.00573407	up
PIRT	644139_at	2.81251	0.00576028	up
MS4A5	64232_at	2.80887	0.0058216	up
LIX1L	128077_at	2.80279	0.00592544	up
SLC12A4	6560_at	2.79972	0.00597838	up
LRSAM1	90678_at	2.79926	0.00598635	up
MEIOB	254528_at	2.79356	0.00608607	up
RAD52	5893_at	2.77435	0.00643357	up
SEPHS1P1	168474_at	2.77144	0.00648771	up
FAM131C	348487_at	2.76816	0.00654917	up
LRRC14B	389257_at	2.76606	0.00658889	up
LINC00477	144360_at	2.75092	0.00688171	up
RRNAD1	51093_at	2.74404	0.00701844	up
SLC1A2	6506_at	2.74313	0.00703674	up
OR5D18	219438_at	2.73876	0.00712524	up
TCOF1	6949_at	2.73744	0.00715216	up
INE1	8552_at	2.73633	0.00717476	up
RNU6-1124P	106481534_at	2.73435	0.00721545	up
GUCA2A	2980_at	2.73302	0.00724297	up
VSX1	30813_at	2.7296	0.00731383	up
SHISAL2A	348378_at	2.71365	0.00765329	up
KIR3DL3	115653_at	2.71362	0.00765379	up
PRSS53	339105_at	2.71268	0.00767437	up
SMIM29	221491_at	2.70857	0.00776432	up
HELT	391723_at	2.70796	0.00777767	up
VN1R5	317705_at	2.70215	0.00790673	up
IKBIP	121457_at	2.69802	0.00799957	up
GSX1	219409_at	2.69257	0.00812362	up
SPEM1	374768_at	2.69162	0.0081455	up
OMG	4974_at	2.69068	0.00816708	up
SIGLEC17P	284367_at	2.69062	0.00816852	up
SCN11A	11280_at	2.68821	0.00822402	up
RPL12P11	128467_at	2.6848	0.0083034	up
OR13C8	138802_at	2.68295	0.00834686	up
GRK7	131890_at	2.68295	0.00834695	up
MSH5-SAPCD1	100532732_at	2.67704	0.00848682	up
ARHGAP22	58504_at	2.67495	0.00853683	up
NDUFB3P3	93996_at	2.67058	0.00864214	up
RN7SKP146	106479160_at	2.66721	0.00872425	up
EMC3-AS1	442075_at	2.66445	0.00879184	up
LOC440313	440313_at	2.66218	0.00884791	up
TRPM2	7226_at	2.65914	0.00892361	up
ZMAT4	79698_at	2.65573	0.0090089	up
RAB20	55647_at	2.65202	0.00910295	up
RN7SL4P	6030_at	2.65073	0.00913564	up
LRRIQ4	344657_at	2.64936	0.00917058	up
SLIT1	6585_at	2.64817	0.00920117	up
C8orf31	286122_at	2.64679	0.0092367	up
MAP3K14-AS1	100133991_at	2.64465	0.009292	up
TMEM234	56063_at	2.64454	0.00929464	up
ELOVL3	83401_at	2.64235	0.00935161	up
DGCR5	26220_at	2.63564	0.00952773	up
PRR23B	389151_at	2.63302	0.00959737	up
ZNF788P	388507_at	2.62763	0.00974204	up
GPAT2	150763_at	2.62606	0.00978451	up
CLEC6A	93978_at	2.62225	0.00988833	up
KIR3DX1	90011_at	2.62216	0.00989079	up
ELMO3	79767_at	2.62204	0.00989411	up
TRABD2B	388630_at	2.62114	0.00991871	up
ZNF696	79943_at	2.61897	0.0099787	up
TMC3	342125_at	2.61879	0.00998357	up

## Sheet: STable6 GSEA_up-reg_endASA+Z
NAME	SIZE	ES	NES	NOM p-val	FDR q-val	FWER p-val	RANK AT MAX
HALLMARK_WNT_BETA_CATENIN_SIGNALING	42	0.463139	1.64807	0.0114943	0.0512831	0.074	5107
HALLMARK_KRAS_SIGNALING_DN	196	0.313375	1.46884	0.00510204	0.157524	0.372	5996
HALLMARK_MYOGENESIS	199	0.299142	1.39861	0.0163317	0.21597	0.616	6833

## Sheet: STable7 GSEA_down-reg_endASA+Z
NAME	SIZE	ES	NES	NOM p-val	FDR q-val	FWER p-val	RANK AT MAX
HALLMARK_MYC_TARGETS_V1	190	-0.522159	-2.76601	0	0	0	3469
HALLMARK_OXIDATIVE_PHOSPHORYLATION	200	-0.490224	-2.6569	0	0	0	5338
HALLMARK_DNA_REPAIR	149	-0.343742	-1.73218	0	0.0107113	0.018	4005
HALLMARK_ALLOGRAFT_REJECTION	193	-0.307486	-1.64403	0	0.0162318	0.034	2928
HALLMARK_HEME_METABOLISM	192	-0.30234	-1.60229	0	0.0160668	0.042	4578
HALLMARK_E2F_TARGETS	196	-0.288426	-1.5757	0	0.0165098	0.051	3942
HALLMARK_MYC_TARGETS_V2	58	-0.328141	-1.38304	0.0490798	0.0821633	0.261	5539
HALLMARK_MTORC1_SIGNALING	195	-0.251693	-1.32981	0.0154639	0.110212	0.364	5317
HALLMARK_REACTIVE_OXYGEN_SPECIES_PATHWAY	49	-0.318117	-1.30318	0.107256	0.121996	0.43	4099

## Sheet: STable8 GSEA_up-reg_postASA+Z
NAME	SIZE	ES	NES	NOM p-val	FDR q-val	FWER p-val	RANK AT MAX
HALLMARK_KRAS_SIGNALING_DN	196	0.345736	1.6339	0	0.0291291	0.08	5054
HALLMARK_SPERMATOGENESIS	134	0.319196	1.43186	0.0145103	0.128779	0.524	4318
HALLMARK_MYOGENESIS	199	0.291298	1.36175	0.0241657	0.174443	0.793	6838
HALLMARK_BILE_ACID_METABOLISM	112	0.276849	1.20882	0.154235	0.482967	1	4597
HALLMARK_PANCREAS_BETA_CELLS	39	0.335906	1.19584	0.20202	0.423457	1	4452
HALLMARK_WNT_BETA_CATENIN_SIGNALING	42	0.323964	1.18665	0.212465	0.376213	1	5406

## Sheet: STable9 GSEA_down-reg_postASA+Z
NAME	SIZE	ES	NES	NOM p-val	FDR q-val	FWER p-val	RANK AT MAX
HALLMARK_OXIDATIVE_PHOSPHORYLATION	200	-0.649594	-3.64168	0	0	0	3957
HALLMARK_MYC_TARGETS_V1	190	-0.562367	-3.15689	0	0	0	5632
HALLMARK_PROTEIN_SECRETION	95	-0.56966	-2.8354	0	0	0	4613
HALLMARK_MTORC1_SIGNALING	195	-0.451583	-2.53892	0	0	0	5487
HALLMARK_GLYCOLYSIS	199	-0.428152	-2.40554	0	0	0	4984
HALLMARK_FATTY_ACID_METABOLISM	155	-0.446122	-2.38928	0	0	0	4457
HALLMARK_ADIPOGENESIS	198	-0.407396	-2.32532	0	0	0	4500
HALLMARK_ANDROGEN_RESPONSE	99	-0.448305	-2.23978	0	0	0	5508
HALLMARK_CHOLESTEROL_HOMEOSTASIS	72	-0.468582	-2.21992	0	0	0	4999
HALLMARK_REACTIVE_OXYGEN_SPECIES_PATHWAY	49	-0.466437	-2.0045	0	0	0	5162
HALLMARK_UNFOLDED_PROTEIN_RESPONSE	109	-0.376984	-1.89501	0	0.000855	0.003	5239
HALLMARK_DNA_REPAIR	149	-0.323811	-1.72583	0	0.00674699	0.022	6054
HALLMARK_TGF_BETA_SIGNALING	53	-0.374413	-1.67445	0.0168919	0.00767524	0.026	2351
HALLMARK_XENOBIOTIC_METABOLISM	197	-0.299063	-1.65359	0	0.00731068	0.027	3836
HALLMARK_COMPLEMENT	200	-0.291882	-1.61469	0	0.00861924	0.034	4831
HALLMARK_ESTROGEN_RESPONSE_LATE	197	-0.275737	-1.5286	0	0.0165907	0.067	4887
HALLMARK_PI3K_AKT_MTOR_SIGNALING	105	-0.300673	-1.51825	0.0138249	0.0169837	0.074	5436
HALLMARK_UV_RESPONSE_UP	156	-0.245252	-1.35708	0.00598802	0.0658366	0.277	5453
HALLMARK_P53_PATHWAY	195	-0.244386	-1.35294	0.00666667	0.064543	0.281	5426
HALLMARK_HYPOXIA	199	-0.23927	-1.329	0.0126582	0.0747124	0.333	4715
HALLMARK_PEROXISOME	103	-0.259394	-1.3282	0.0432692	0.0716634	0.336	6271
HALLMARK_APOPTOSIS	160	-0.2343	-1.27382	0.0301205	0.10112	0.455	4908
HALLMARK_IL2_STAT5_SIGNALING	199	-0.222005	-1.24605	0.0533333	0.121191	0.527	4452
HALLMARK_COAGULATION	137	-0.227874	-1.22867	0.0816327	0.13264	0.581	4571
HALLMARK_MYC_TARGETS_V2	58	-0.270899	-1.20868	0.133106	0.146564	0.634	4431
HALLMARK_KRAS_SIGNALING_UP	199	-0.206337	-1.16574	0.10274	0.199974	0.756	4754
